# Supplementary material for: Synthesis and fluorescence enhancement of oligophenylene-substituted calix[4]arene assembliesElectronic supplementary information (ESI) available: experimental procedures and spectral data of all new compounds. See http://www.rsc.org/suppdata/cc/b2/b210493h/
Source: Royal Society of Chemistry journal article supplement (doi:10.1039/b210493h), 2002-12-03
Supplement: b210493h.doc [file b210493h.doc]

**Supplementary Information**:

# **Experimental procedure**

1H NMR spectra were recorded using a Jeol JHM-EX270 FT NMR spectrometer and are referenced to the residual CHCl3 7.24 ppm. 13C NMR spectra were recorded using a Varian INOVA-400 FT NMR spectrometer and are referenced to the CDCl3 77 ppm. Mass spectroscopy (MS) measurements were carried using either fast atom bombardment (FAB) or matrix-assisted laser desorption ionisation time-of-flight (MALDI-TOF) technique. All the physical measurements were performed in CHCl3. Electronic absorption (UV-vis) and fluorescence spectra were recorded using a Varian Cary 100 Scan Spectrophotometer and a PTI Luminescence Spectrophotometer, respectively. The fluorescence quantum yields in chloroform were determined by dilution method using quinine in 0.1 N H2SO4 (exc = 313 nm,  = 0.48) as a standard. The reported quantum yield was an average of two independent measurements. The fluorescence decay curves were recorded on a PTI fluorescence Master 2M1 Luminescence Spectrophotometer using PTI G2-3300 Nitrogen Laser as excitation. The lifetimes were estimated from the measured fluorescence decay using iterative fitting procedure.

General Procedure for the Suzuki cross-coupling reaction:

To a stirred solution of aryl bromide or iodide (0.1 to 0.6 mmole) and about 40 mole % of Pd(OAc)2 : 2 P(o-tol)3 or Pd[(PPh3)]4 in 15 mL of toluene was added with 5 mL of 2M K2CO3 under N2 and 6 eqv. of arylboronic acid in 10 mL of methanol, respectively. After being heated to 70-75 C for overnight, the reaction mixture was added with 50 mL of 2M Na2CO3 and then extracted twice with CH2Cl2 (50 mL). The combined organic layers were dried over anhydrous MgSO4 and evaporated to dryness. The crude product was purified by silica-gel column chromatography using petroleum ether and CH2Cl2 as eluent.

**8**: Theabove procedure was followed using 499 mg (0.34 mmol) of tetraiodocalix[4]arene, 404 mg (2.01 mmol) of 4-bromophenylboronic acid and 155 mg (0.13 mmol) of Pd[(PPh3)]4 was heated to 45 C for 24h. The pure product was separated by silica gel column chromatographyusing CH2Cl2as eluent affording 304 mg (56 %) of a white solid. 1H NMR (400 MHz, CDCl3, 25°C, ) 7.24 (d, *J* = 8.4 Hz, 8H) 6.94 (d, *J* = 7.2 Hz, 8H), 6.85 (s, 8H), 4.54 (d, *J* = 13.2 Hz, 4H), 3.96 (t, *J* = 7.2 Hz, 8H), 3.26 (d, *J* = 13.2 Hz, 4H), 1.96-1.97 (m, 8H), 1.26-1.41 (m, 56H), 0.87 (t, *J* = 6.8 Hz, 12H). 13C NMR (100 MHz, CDCl3, 25°C, ) 156.5, 139.7, 135.3, 133.8, 131.4, 128.0, 126.6, 120.6, 75.5, 32.0, 31.2, 30.4, 30.0, 29.8, 29.5, 26.4, 22.7, 14.1. MS (FAB) m/z 1605.9 [M+].

**9a**: Theabove procedure was followed using 232 mg (0.16 mmol) of tetraiodocalix[4]arene, 223 mg (0.93 mmol) of 4-hexylsulfanylphenylboronic acid, 14 mg (0.06 mmol) of Pd(OAc)2 and 38 mg (0.12 mmol) of P(o-tol)3. The pure product was separated by silica gel column chromatographyusing CH2Cl2as eluent affording 220 mg (81 %) of a white solid. 1H NMR (400 MHz, CDCl3, 25°C, ) 7.07 (d, *J* = 8.0 Hz, 8H) 7.03 (d, *J* = 7.6 Hz, 8H), 6.89 (s, 8H), 4.54 (d, *J* = 13.2 Hz, 4H), 3.96 (t, *J* = 7.4 Hz, 8H), 3.25 (d, *J* = 13.2 Hz, 4H), 2.88 (t, *J* = 7.4 Hz, 8H), 1.99 (bt, *J* = 6.8 Hz, 8H), 1.56-1.70 (m, 8H), 1.28-1.45 (m, 80H), 0.84-0.92 (m, 24H). 13C NMR (100 MHz, CDCl3, 25°C, ) 156.0, 138.4, 135.1, 135.0, 134.4, 128.6, 127.0, 126.6, 75.5, 33.6, 32.0, 31.4, 30.4, 30.0, 29.8, 29.5, 29.0, 28.6, 26.4, 22.7, 22.5, 14.1, 14.0. MS (FAB) m/z 1754.5 [M+]. Mp = 48 C.

**9b**: Theabove procedure was followed using 177 mg (0.12 mmol) of tetraiodocalix[4]arene, 224 mg (0.71 mmol) of 4’-hexylsulfanyl-4-biphenylboronic acid, 13 mg (0.06 mmol) of Pd(OAc)2 and 35 mg (0.11 mmol) of P(o-tol)3. The pure product was separated by silica gel column chromatographyusing CH2Cl2as eluent affording 245 mg (61 %) of a white solid. 1H NMR (400 MHz, CDCl3, 25°C, ) 7.30-7.33 (m, 16H), 7.20-7.24 (m, 16H), 7.00 (bs, 8H), 4.59 (d, *J* = 12.8 Hz, 4H), 4.00 (bt, *J* = 7.0 Hz, 8H), 3.33 (d, *J* = 13.6 Hz, 4H), 2.94 (t, *J* = 7.4 Hz, 8H), 2.00 (bt, *J* = 6.4 Hz, 8H), 1.56-1.70 (m, 8H), 1.29-1.44 (m, 80H), 0.87-0.91 (m, 24H). 13C NMR (100 MHz, CDCl3, 25°C, ) 156.3, 140.0, 138.2, 137.8, 135.9, 135.1, 134.6, 128.6, 127.1, 126.9, 126.7, 75.6, 33.4, 32.0, 31.4, 30.4, 30.1, 29.8, 29.5, 29.1, 28.6, 26.4, 22.7, 22.6, 14.1, 14.0. HRMS (MALDI-TOF) Calcd for C140H184O4S4, 2057.3077, Found: 2057.3072 (M+). Mp = 36 C.

**9c**: Theabove procedure was followed using 247 mg (0.15 mmol) of tetrabromophenylcalix[4]arene, 291 mg (0.92 mmol) of 4’-hexylsulfanyl-4-biphenylboronic acid, 14 mg (0.06 mmol) of Pd(OAc)2 and 38 mg (0.12 mmol) of P(o-tol)3. The pure product was separated by silica gel column chromatographyusing CH2Cl2as eluent affording 237 mg (65 %) of a white solid. 1H NMR (400 MHz, CDCl3, 25°C, ) 7.48 (s, 16H), 7.41-7.43 (m, 16H), 7.28-7.30 (m, 16 H), 7.05 (bs, 8H), 4.63 (d, *J* = 12.8 Hz, 4H), 4.04 (bs, 8H), 3.36 (d, *J* = 13.6 Hz, 4H), 2.97 (t, *J* = 7.4 Hz, 8H), 2.04-2.05 (m, 8H), 1.66-1.74 (m, 8H), 1.27-1.50 (m, 80H), 0.86-0.93 (m, 24H). 13C NMR (100 MHz, CDCl3, 25°C, ) 156.3, 140.1, 139.4, 138.7, 138.2, 137.5, 136.3, 135.1, 134.6, 128.6, 127.1, 126.8, 75.5, 33.3, 32.0, 31.4, 30.4, 30.1, 29.9, 29.5, 29.0, 28.6, 26.5, 22.7, 22.5, 14.1, 14.0. HRMS (MALDI-TOF) Calcd for C164H200O4S4, 2361.4329, Found: 2361.4324 (M+). Mp = 203 C.

## General procedure for the MCPBA oxidation of alkylsulfanyl group

To a stirred solution of alkylsulfanyl**-**substituted calixarene **9** (400 mg, 1.8 mmol) in CH2Cl2 at 0 ˚C was slowly added 8.5 equivalent of MCPBA (650 mg, 3.6 mmol). After stirring for 2 h, the white suspension was filtered off and the filtrate was washed with Na2CO3 solution, dried over anhydrous MgSO4 and evaporated to dryness. The crude product was then purified by silica gel chromatography using gradient elution technique with CH2Cl2/ethyl acetate as eluents affording 350 g of **10** in 76% yield.

**10a**: 1H NMR (400 MHz, CDCl3, 25°C, )  (d, *J* = 8.0 Hz, 8H), 7.35 (d, *J* = 7.6 Hz, 8H), 6.97 (s, 8 H), 4.59 (d, *J* = 12.8 Hz, 4H), 4.01 (t, *J* = 7.2 Hz, 8H), 3.32 (d, *J* = 13.2 Hz, 4H), 3.09 (t, *J* = 7.8 Hz, 8H), 2.00 (bt, *J* = 7.0 Hz, 8H), 1.76-1.68 (m, 8H), 1.22-1.42 (m, 80H), 0.88 (t, *J* = 6.4 Hz, 12H), 0.82 (t, *J* = 6.8 Hz, 12H). 13C NMR (100 MHz, CDCl3, 25°C, ) 157.2, 146.1, 137.3, 135.4, 133.2, 128.2, 127.2, 75.7, 56.1, 32.0, 31.1, 31.3, 30.3, 30.0, 29.8, 29.4, 27.8, 26.3, 22.7, 22.2, 22.2, 14.1, 13.9. MS (FAB) m/z 1883.6 [M+ + 1]. Mp = 75-76 C.

**10b**: 1H NMR (400 MHz, CDCl3, 25°C, ) 7.82 (d, *J* = 8.0 Hz, 8H), 7.57 (d, *J* = 7.6 Hz, 8H), 7.40 (d, *J* = 8.0 Hz, 8H), 7.30 (bs, 8H), 7.03 (s, 8 H), 4.63 (d, *J* = 13.2 Hz, 4H), 4.04 (t, *J* = 7.0 Hz, 8H), 3.36 (d, *J* = 13.2 Hz, 4H), 3.13 (t, *J* = 7.8 Hz, 8H), 2.02 (bt, *J* = 7.2 Hz, 8H), 1.79-1.69 (m, 8H), 1.26-1.45 (m, 80H), 0.81-0.92 (m, 24H). 13C NMR (100 MHz, CDCl3, 25°C, ) 156.7, 145.6, 141.5, 137.7, 136.6, 135.3, 134.0, 128.4, 127.9, 127.3, 127.3, 126.9, 75.6, 56.1, 32.0, 31.4, 31.2, 30.4, 30.0, 29.8, 29.4, 27.9, 26.4, 22.7, 22.4, 22.2, 14.1, 13.9. MS (MALDI-TOF) m/z 2185.3 [M+]. Mp = 100.5-102 C.

**10c**: 1H NMR (400 MHz, CDCl3, 25°C, ) 7.87 (d, *J* = 8.4 Hz, 8H), 7.65 (d, *J* = 8.0 Hz, 8H), 7.48-7.53 (m, 16H), 7.41 (bs, 8H), 7.27 (bs, 8H), 7.03 (bs, 8H), 4.62 (d, *J* = 12.8 Hz, 4H), 4.02 (bs, 8H), 3.35 (d, *J* = 13.2 Hz, 4H), 3.14 (t, *J* = 8.0 Hz, 8H), 2.02 (bs, 8 H), 1.69-1.79 (m, 8H), 1.26-1.45 (m, 80H), 0.81-0.92 (m, 24H). 13C NMR (100 MHz, CDCl3, 25°C, ) 156.5, 145.7, 140.9, 140.6, 137.9, 137.7, 137.4, 135.3, 134.4, 128.6, 128.5, 127.4, 127.3, 127.0, 126.9, 75.6, 56.2, 32.0, 31.2, 30.4, 30.0, 29.8, 29.7, 29.5, 27.9, 26.4, 22.7, 22.5, 22.3, 14.1, 13.9. MS (MALDI-TOF) m/z 2512.4 [M+ + Na]. Mp = 220-221.5 C.

**Monomers:**

**11a**: 1H NMR (400 MHz, CDCl3, 25°C, ) 7.44 (d, *J* = 8.4 Hz, 2H), 7.32 (d, *J* = 8.4 Hz, 2H), 7.18 (s, 2H), 3.76 (t, *J* = 6.8 Hz, 2H), 2.92 (t, *J* = 7.4 Hz, 2H), 2.31 (s, 6H), 1.83-1.76 (m, 2H), 1.68-1.61 (m, 2H), 1.45-1.38 (m, 4H), 1.29-1.26 (m, 16H), 0.87 (t, *J* = 6.8 Hz, 6H). 13C NMR (100 MHz, CDCl3, 25°C, ) 155.7, 138.5, 135.7, 135.4, 131.2, 129.2, 127.3, 127.2, 123.5, 72.5, 33.7, 31.9, 31.3, 30.9, 30.4, 29.6, 29.5, 29.3, 29.1, 28.5, 26.1, 22.6, 22.5, 16.4, 14.1, 14.0. MS (FAB) m/z 454.5 [M+].

**11b**: 1H NMR (400 MHz, CDCl3, 25°C, ) 7.62 (s, 4H), 7.55 (d, *J* = 8.8 Hz, 2H), 7.39 (d, *J* = 8.8 Hz, 2H), 7.28 (s, 2H), 3.80 (t, *J* = 6.8 Hz, 2H), 2.96 (t, *J* = 7.6 Hz, 2H), 2.35 (s, 6H), 1.81-1.85 (m, 2H), 1.67-1.70 (m, 2H), 1.51-1.54 (m, 4H), 1.29-1.26 (m, 16H), 0.89 (t, *J* = 6.6 Hz, 6H). 13C NMR (100 MHz, CDCl3, 25°C, ) 155.8, 139.9, 138.8, 138.1, 136.1, 135.9, 131.3, 129.0, 127.4, 127.3, 127.0, 72.5, 33.5, 31.9, 31.4, 30.5, 29.6, 29.5, 29.3, 29.1, 28.6, 26.2, 22.7, 22.6, 16.5, 14.1, 14.0. MS (FAB) m/z 530.6 [M+].

**11c**: 1H NMR (400 MHz, CDCl3, 25°C, ) 7.79 (d, *J* = 8.8 Hz, 2H), 7.66 (s, 4H), 7.62 (d, *J* = 8.8 Hz, 2H), 7.55 (d, *J* = 8.8 Hz, 2H), 7.38 (d, *J* = 8.4 Hz, 2H), 7.28 (s, 2H), 3.79 (t, *J* = 6.6 Hz, 2H), 2.95 (t, *J* = 7.4 Hz, 2H), 2.34 (s, 6H), 1.80-1.84 (m, 2H), 1.62-1.70 (m, 2H), 1.42-1.51 (m, 4H), 1.31-1.23 (m, 16H), 0.87 (t, *J* = 6.8 Hz, 6H). 13C NMR (100 MHz, CDCl3, 25°C, ) 155.9, 140, 139.6, 139.3, 139.0, 138.0, 136.4, 135.9, 131.3, 129.1, 127.4, 127.3, 127.2, 72.5, 33.6, 31.9, 31.4, 30.5, 29.6, 29.5, 29.3, 29.1, 28.5, 26.2, 22.7, 22.6, 16.5, 14.1, 14.0. MS (FAB) m/z 606.6 [M+].

**12a**: 1H NMR (400 MHz, CDCl3, 25°C, ) 7.89 (d, *J* = 8.4 Hz, 2H), 7.70 (d, *J* = 8.0 Hz, 2H), 7.24 (s, 2 H), 3.78 (t, *J* = 6.4 Hz, 2H), 3.08 (t, *J* = 8.2 Hz, 2H), 2.33 (s, 6 H), 1.77-1.85 (m, 2H), 1.73-1.76 (m, 2H), 1.50-1.58 (m, 2H), 1.23-1.40 (m, 18H), 0.91-0.85 (t, 6H). 13C NMR (100 MHz, CDCl3, 25°C, ) 156.7, 146.2, 137.0, 134.2, 131.7, 128.3, 127.7, 127.4, 72.5, 56.5, 32.0, 31.2, 30.5, 29.7, 29.7, 29.6, 29.5, 29.4, 28.0, 26.2, 22.8, 22.4, 16.6, 14.2, 14.0. MS (FAB) m/z 487.5 [M+ + 1].

**12b**: 1H NMR (400 MHz, CDCl3, 25°C, ) 7.97 (d, *J* = 8.8 Hz, 2H), 7.81 (d, *J* = 8.8 Hz, 2H), 7.67(s, 4H), 7.29 (s, 2H), 3.80 (t, *J* = 6.4 Hz, 2H), 3.13 (t, *J* = 8.0 Hz, 2H), 2.36 (s, 6H), 1.77-1.85 (m, 2H), 1.73-1.76 (m, 2H), 1.50-1.58 (m, 2H), 1.23-1.40 (m, 18H), 0.85-0.91 (t, 6H). 13C NMR (100 MHz, CDCl3, 25°C, ) 156.1, 146.0, 141.3, 137.5, 137.3, 135.3, 131.4, 128.7, 128.6, 127.6, 127.5, 127.4, 72.5, 56.4, 31.8, 31.1, 30.4, 30.3, 29.6, 29.5, 29.3, 28.8, 27.9, 26.1, 22.6, 22.2, 16.5, 14.1, 13.9. MS (FAB) m/z 563.7 [M+ + 1].

**12c**: 1H NMR (400 MHz, CDCl3, 25°C, ) 7.97 (d, *J* = 8.8 Hz, 2H), 7.81 (d, *J* = 8.8 Hz, 2H), 7.75 (d, *J* = 8.4 Hz, 2H), 7.70 (d, *J* = 8.8 Hz, 2H), 7.68 (d, *J* = 8.4 Hz, 2H), 7.64 (d, *J* = 8.8 Hz, 2H), 7.28 (s, 2H), 3.79 (t, *J* = 6.6 Hz, 2H), 3.11 (t, *J* = 8.2 Hz, 2H), 2.34 (s, 6H), 1.78-1.83 (m, 2H), 1.71-1.76 (m, 2H), 1.50-1.58 (m, 2H), 1.23-1.38 (m, 18H), 0.83-0.90 (t, 6H). 13C NMR (100 MHz, CDCl3, 25°C, ) 155.8, 146.0, 141.0, 140.3, 138.4, 137.7, 137.6, 135.6, 131.2, 128.6, 127.7, 127.6, 127.5, 127.3, 127.3, 127.1, 72.5, 56.5, 32.0, 31.3, 30.5, 29.7, 29.7, 29.6, 29.4, 28.1, 26.3, 22.8, 22.7, 22.3, 16.6, 14.2, 14.0. MS (FAB) m/z 538.7 [M+].
